# Supplementary material for: Water, sanitation, and hygiene access among people who inject drugs in Tijuana and San Diego in 2020–2021: a cross-sectional study
Source: Int J Equity Health. 2024 Apr 22;23:79. doi: 10.1186/s12939-024-02163-x (PMC11034064; doi:10.1186/s12939-024-02163-x)
Supplement: Supplementary file 1 — Additional file 1: Supplementary Table 1. Characteristic of excluded and included La Frontera participants, 2020–2021. [file 12939_2024_2163_MOESM1_ESM.xlsx]

## Sheet: Supplemental Table 1
Supplemental Table 1. Characteristic of excluded and included La Frontera participants, 2020-2021
Variable	Included n (value)	Excluded n (value)	All n (value)
Agea	586 (43.2)	26 (38.8)	612 (43.0)
City of residence (%)
San Diego	384 (65.5)	26 (100)	410 (67.0)
Tijuana	202 (34.5)	0 (0)	202 (33.0)
Gender (%)
Men	437 (74.6)	17 (65.4)	454 (74.2)
Women	148 (25.3)	9 (34.6)	157 (25.7)
Trans men	1 (0.2)	0 (0)	1 (0.2)
Housing status (%)
Main housing in the last 6 months
Permanent housing	212 (36.2)	1 (3.8)	213 (34.8)
Sheltered homelessness	125 (21.3)	6 (23.1)	131 (21.4)
Unsheltered homelessness	249 (42.5)	19 (73.1)	268 (43.8)
Unsheltered homelessness at least once in the last 6 months	303 (51.7)	23 (88.4)	326 (53.3)
Sex work in the las 6 months (%)
No	532 (90.8)	25 (96.2)	557 (91.0)
Yes	53 (9.0)	0 (0)	53 (8.7)
Missing	1 (0.2)	1 (3.8)	2 (0.3)
Total	586 (100)	26 (100)	612 (100)
a Mean
